# Supplementary material
Source: PubMed Central journal article supplement (PMC2291073)
Supplement: NIHMS43206-supplement-01.pdf [file NIHMS43206-supplement-01.pdf]

## Supplementary Methods and Results

The Cys-AL (CGGAPTYSPPPPPLL) and Cys-AT (CEAIYAAPFAKKK) peptides were tethered to the surface *in trans* through sequential Michael additions via the crosslinker bisacrylamide. The kinase reaction and chemiluminiscent detection were performed as described in Materials and Methods. Cys-AT at 1 mM showed a moderate phosphorylation signal while Cys-AL at the same concentration was not phosphorylated (Fig. S1). Combining 1 mM Cys-AT with 1 mM Cys-AL increased the signal roughly two fold while combining 0.25 mM Cys-AT with 0.25 mM Cys-AL resulted in a signal that was still stronger than 1 mM Cys-AT alone.

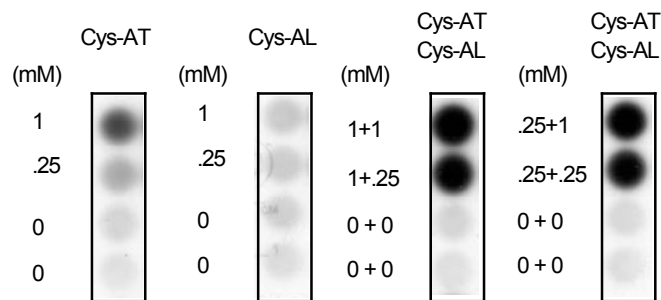

Fig. S1. Enhanced phosphorylation of Cys-AT with Cys-AL. Cys-AT and Cys-AL alone and combination of Cys-AT and Cys-AL in the indicated concentration were immobilized to hydrogel surface, followed by the kinase assay with 25  $\mu$ g of K562 cell lysate.

To quantitate peptide immobilization, we synthesized Cys-AT with biocytin replacing the terminal lysine (Cys-AT-Biocytin, CEAIYAAPFAKKKB). The density of peptide immobilized on the surface is low, in the picomole range, thus it cannot be measured with typical detection methods. Briefly, after the plate was activated, either 50  $\mu$ l SR415 or bisacrylamide were added at 25 mM. The Cys-AL and Cys-AT-Biocytin peptides were added to the hydrogel plate in 1:1 ratio at 0.5, 0.05, or 0 mM. The plate was again washed and then blocked overnight with 10% BSA in 50 mM TBS, pH 7.5 at 4°C. The FluoReporter kit (Invitrogen, Carlsbad, CA, U.S.A.) was then used to determine the amount of biocytin bound as a direct

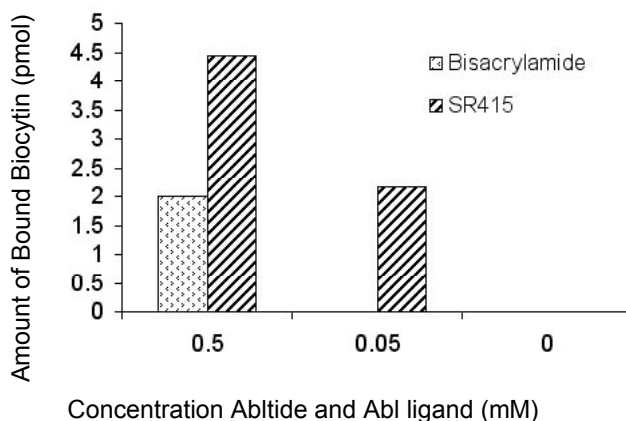

Fig. S2. Comparison of the binding capacity of Cys-Abltide with Biocytin at C-terminus via different crosslinkers. The peptide was immobilized to the hydrogel plate as described in Materials and Methods. Cys-AL and Cys-AT-Biocytin peptides were attached at 0.5, 0.05, or 0 mM to the hydrogel plate via bisacrylamide or SR415. The FluoReporter kit was used to determine the amount of Biocytin present on the surface.

measure of tethered Cys-AT. First, 50  $\mu$ l per well 1X PBS was added to each well. Next, 50  $\mu$ l per well 2X Biotective Green reagent was added. After a five minute incubation at room temperature, the fluorescence was read with a Bio-Rad Molecular Imager FX using excitation at 488 nm and emission at 532 nm. A standard curve was set up to evaluate biocytin levels. The FluoReporter kit showed SR415 significantly increased the amount of Cys-AT-Biocytin on the hydrogel surface compared to bisacrylamide (Fig. S2).

A screen of all 27 pyridopyrimidine compounds from the focused library is shown in Fig. S3.

We also demonstrated that the assay could be used to compare the effects of weaker small-molecule inhibitors on Bcr-Abl kinase activity. Here, K562 cell extracts were treated with imatinib (5  $\mu$ M) and the 80 inhibitors from the BioMol ScreenWell™ Kinase Inhibitor Library (200  $\mu$ M each). None of the compounds in the ScreenWell library are potent inhibitors of c-Abl or Bcr-Abl, although PP1 and PP2 are known Src family kinase inhibitors. In the presence of imatinib the majority of compounds appeared to have no further inhibitory effect on Bcr-Abl activity; however, several compounds diminished Cys-AT phosphorylation significantly. In particular, the inhibitors staurosporine (compound number 6), AG1478 (#18), damnacanthal (#22), PP1 (#24), and PP2 (#52) each appeared to decrease Bcr-Abl activity markedly compared to imatinib (5  $\mu$ M) alone (Fig. S4 and Table.S1).

# Screen of 27 candidate Abl/Bcr-Abl inhibitors for apparent IC<sub>50</sub> values

| No | Inhibitor | R Group                                                                           | 1                                                                                 | 10                                                                                | 10 <sup>2</sup>                                                                   | 10 <sup>3</sup>                                                                   | IC <sub>50</sub><br>(nM) |
|----|-----------|-----------------------------------------------------------------------------------|-----------------------------------------------------------------------------------|-----------------------------------------------------------------------------------|-----------------------------------------------------------------------------------|-----------------------------------------------------------------------------------|--------------------------|
| 1  | PD166326  | 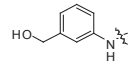 | 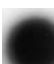 | 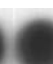 | 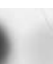 | 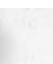 | ~20                      |
| 2  | PD173958  | 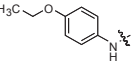 | 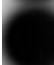 | 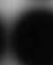 | 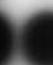 | 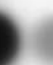 | ~500                     |
| 3  | PD173956  | 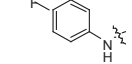 | 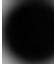 | 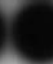 | 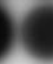 | 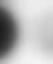 | ~300                     |
| 4  | PD173955  | 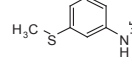 | 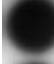 | 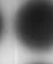 | 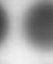 | 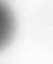 | ~100                     |
| 5  | PD173952  | 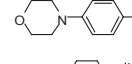 | 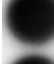 | 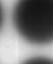 | 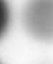 | 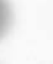 | ~35                      |
| 6  | DV1-10    | 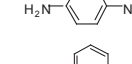 | 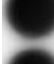 | 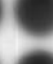 | 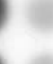 | 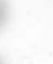 | ~20                      |
| 7  | DV2-43    | 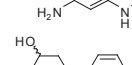 | 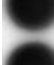 | 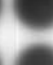 | 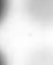 | 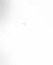 | ~20                      |
| 8  | DV2-281   | 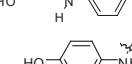 | 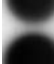 | 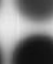 | 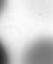 | 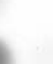 | ~15                      |
| 9  | DV2-47    | 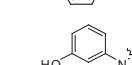 | 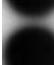 | 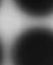 | 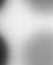 | 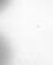 | ~45                      |
| 10 | DV2-89    | 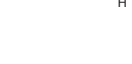 | 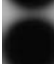 | 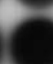 | 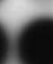 | 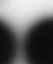 | ~40                      |

Without compound

IM

|    |         |                                                                                     |                                                                                     |                                                                                     |                                                                                     |                                                                                     |       |
|----|---------|-------------------------------------------------------------------------------------|-------------------------------------------------------------------------------------|-------------------------------------------------------------------------------------|-------------------------------------------------------------------------------------|-------------------------------------------------------------------------------------|-------|
| 11 | DV-M016 | 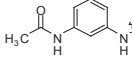 | 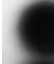 | 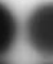 | 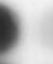 | 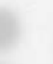 | ~20   |
| 12 | DV-M017 | 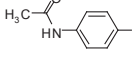 | 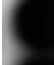 | 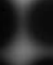 | 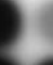 | 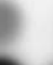 | ~55   |
| 13 | DV2-87  | 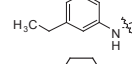 | 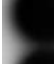 | 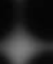 | 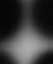 | 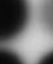 | ~1000 |
| 14 | DV2-103 | 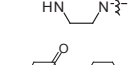 | 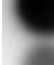 | 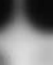 | 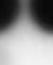 | 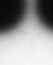 | >1000 |
| 15 | DV2-273 | 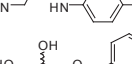 | 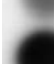 | 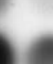 | 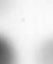 | 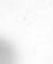 | <1    |
| 16 | DV2-271 | 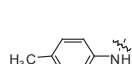 | 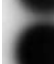 | 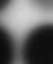 | 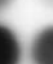 | 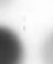 | ~8    |
| 17 | DV3-081 | 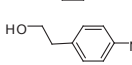 | 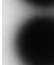 | 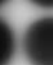 | 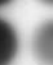 | 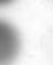 | ~150  |
| 18 | DV3-096 | 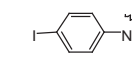 | 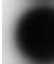 | 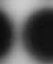 | 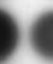 | 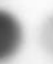 | ~40   |
| 19 | DV2-37  | 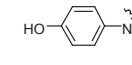 | 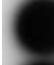 | 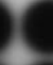 | 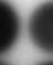 | 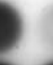 | ~150  |
| 20 | DV2-53  | 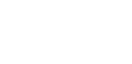 | 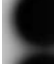 | 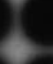 | 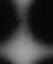 | 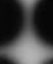 | ~300  |

Without compound

IM

Fig S3A

| No               | Inhibitor | R Group                                                                           | 1                                                                                 | 10                                                                                | 10 <sup>2</sup>                                                                   | 10 <sup>3</sup>                                                                   | IC <sub>50</sub><br>(nM) |
|------------------|-----------|-----------------------------------------------------------------------------------|-----------------------------------------------------------------------------------|-----------------------------------------------------------------------------------|-----------------------------------------------------------------------------------|-----------------------------------------------------------------------------------|--------------------------|
| 21               | DV2-287   | 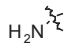 | 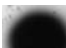 | 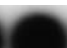 | 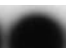 | 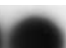 | >1000                    |
| 22               | PD180970  | 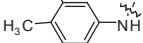 | 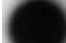 | 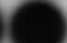 | 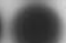 | 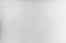 | 10-100                   |
| 23               | DV2-167   | 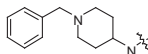 | 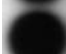 | 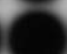 | 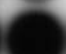 | 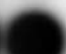 | >1000                    |
| 24               | DV2-171   | 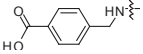 | 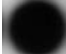 | 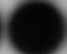 | 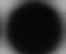 | 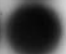 | >1000                    |
| 25               | DV2-155   | 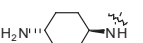 | 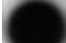 | 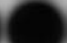 | 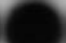 | 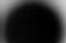 | >1000                    |
| 26               | DV5-31    | 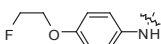 | 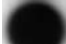 | 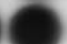 | 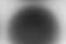 | 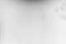 | ~200                     |
| 27               | DV2-289   | 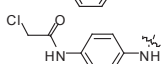 | 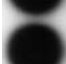 | 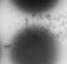 | 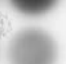 | 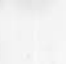 | ~20                      |
| Without compound |           |                                                                                   | 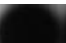 | 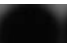 | 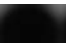 | 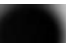 |                          |
| IM               |           |                                                                                   | 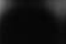 | 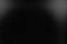 | 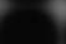 | 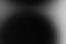 |                          |

Fig S3B

The screen was performed using the standard assay conditions: 25  $\mu$ l 0.05 mM Cys-AT and Cys-AL were bound to a hydrogel plate with SR415 as the crosslinker. During the kinase reaction, 0.005 U c-Abl were treated with a titration of each compound (1, 10, 100 or 1000 nM) for 1 h at 30°C with 10  $\mu$ M ATP, where without compound is DMSO only and IM is imatinib mesylate. Detection was done with chemiluminescence. The x-ray film was scanned and the density of each spot was quantified by Quantity one software. The relative density of each spot was obtained by normalized to the untreated control and apparent IC<sub>50</sub> calculated as the concentration of the compounds corresponding to a 50% decrease in relative density.

Fig S4. Model screen with BioMol Screen-Well™ Kinase Inhibitor Library. (A) Kinase assays were with K562 cell lysates with 200  $\mu$ M each compound from the Library (B1 to H8) in the presence of 5  $\mu$ M IM. (B) The relative fluorescence reading is calculated by: (fluorescence reading of the compound)/ (mean fluorescence at 5  $\mu$ M IM) \*100. The solid line is the mean of all the compounds and the dashed lines represent one standard deviation (SD).

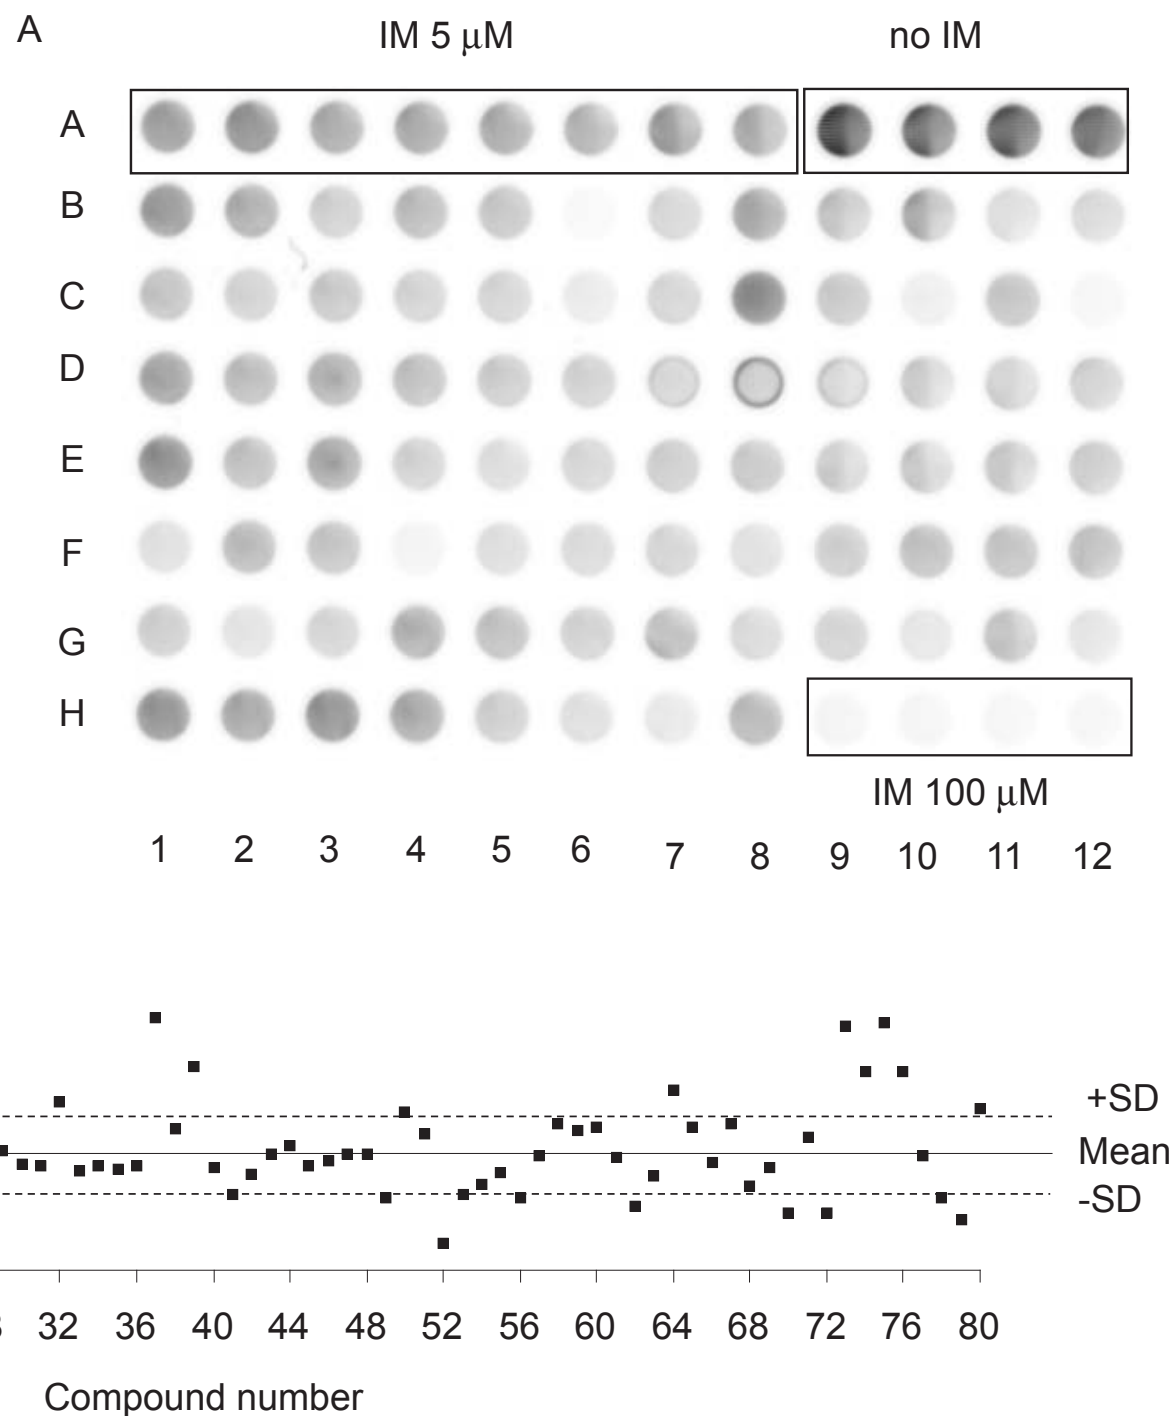

Table S1 The BioMol ScreenWell™ compounds name and plate location

| Number | Plate Location | Inhibitor Name     | Number | Plate Location | Inhibitor Name             |
|--------|----------------|--------------------|--------|----------------|----------------------------|
| 1      | B1             | PD-98059           | 41     | E5             | KN-93                      |
| 2      | B2             | U-0126             | 42     | E6             | ML-7                       |
| 3      | B3             | SB-203580          | 43     | E7             | ML-9                       |
| 4      | B4             | H-7                | 44     | E8             | 2-Aminopurine              |
| 5      | B5             | H-9                | 45     | E9             | N9-Isopropyl-olomoucine    |
| 6      | B6             | Staurosporine      | 46     | E10            | Olomoucine                 |
| 7      | B7             | AG-494             | 47     | E11            | iso-Olomoucine             |
| 8      | B8             | AG-825             | 48     | E12            | Roscovitine                |
| 9      | B9             | Lavendustin A      | 49     | F1             | 5-Iodotubercidin           |
| 10     | B10            | RG-14620           | 50     | F2             | LFM-A13                    |
| 11     | B11            | Tyrphostin 23      | 51     | F3             | SB-202190                  |
| 12     | B12            | Tyrphostin 25      | 52     | F4             | PP2                        |
| 13     | C1             | Tyrphostin 46      | 53     | F5             | ZM 336372                  |
| 14     | C2             | Tyrphostin 47      | 54     | F6             | SU 4312                    |
| 15     | C3             | Tyrphostin 51      | 55     | F7             | AG-1296                    |
| 16     | C4             | Tyrphostin 1       | 56     | F8             | GW 5074                    |
| 17     | C5             | Tyrphostin AG 1288 | 57     | F9             | Palmitoyl-DL-carnitine Cl  |
| 18     | C6             | Tyrphostin AG 1478 | 58     | F10            | Rottlerin                  |
| 19     | C7             | Tyrphostin AG 1295 | 59     | F11            | Genistein                  |
| 20     | C8             | Tyrphostin 9       | 60     | F12            | Daidzein                   |
| 21     | C9             | HNMPA              | 61     | G1             | Erbstatin analog           |
| 22     | C10            | Damnacanthal       | 62     | G2             | Quercetin dihydrate        |
| 23     | C11            | Piceatannol        | 63     | G3             | SU1498                     |
| 24     | C12            | PP1                | 64     | G4             | ZM 449829                  |
| 25     | D1             | AG-490             | 65     | G5             | BAY 11-7082                |
| 26     | D2             | AG-126             | 66     | G6             | DRB                        |
| 27     | D3             | AG-370             | 67     | G7             | HBDDE                      |
| 28     | D4             | AG-879             | 68     | G8             | SP 600125                  |
| 29     | D5             | LY 294002          | 69     | G9             | Indirubin                  |
| 30     | D6             | Wortmannin         | 70     | G10            | Indirubin-3'-monooxime     |
| 31     | D7             | GF 109203X         | 71     | G11            | Y-27632                    |
| 32     | D8             | Hypericin          | 72     | G12            | Kenpaullone                |
| 33     | D9             | Ro 31-8220         | 73     | H1             | Terreic acid               |
| 34     | D10            | Sphingosine        | 74     | H2             | Triciribine                |
| 35     | D11            | H-89               | 75     | H3             | BML-257                    |
| 36     | D12            | H-8                | 76     | H4             | SC-514                     |
| 37     | E1             | HA-1004            | 77     | H5             | BML-259                    |
| 38     | E2             | HA-1077            | 78     | H6             | Apigenin                   |
| 39     | E3             | HDBA               | 79     | H7             | BML-265 (Erlotinib analog) |
| 40     | E4             | KN-62              | 80     | H8             | Rapamycin                  |
